# Supplementary material for: A cerium oxide-based nanomedicine for pH-triggered chemodynamic/chemo combination therapy
Source: Royal Society of Chemistry journal article supplement (doi:10.1039/d1tb02245h), 2022-01-01
Supplement: d1tb02245h1.pdf [file d1tb02245h1.pdf]

# Cerium Oxide-based Nanomedicine for pH-triggered Chemodynamic/Chemo Combination Therapy

Ying Chen,<sup>a</sup> Jiahui Zan,<sup>a</sup> Yong Liu,<sup>a</sup> Peipei Kuang,<sup>a</sup> Chunmei Guo,<sup>a</sup> Chen Xie,<sup>\*a</sup> Wei Huang,<sup>b</sup> Quli Fan<sup>\*a</sup>

<sup>a</sup> Key Laboratory for Organic Electronics and Information Displays & Jiangsu Key Laboratory for Biosensors, Institute of Advanced Materials (IAM), Jiangsu National Synergetic Innovation Center for Advanced Materials (SICAM), Nanjing University of Posts & Telecommunications, Nanjing 210023, China.

Email: iamcxie@njupt.edu.cn, iamqlfan@njupt.edu.cn

<sup>b</sup> Frontiers Science Center for Flexible Electronics (FSCFE), MIIT Key Laboratory of Flexible Electronics (KLoFE), Northwestern Polytechnical University, Xi'an 710072, China

# 1. Supporting figures

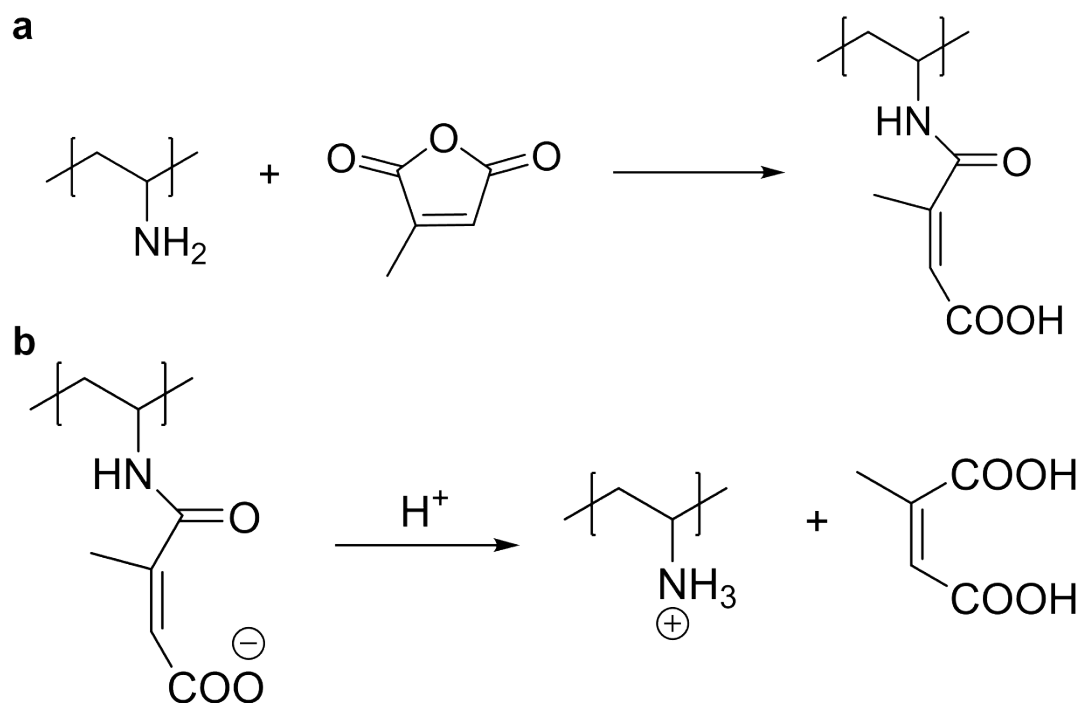

**Scheme S1.** (a) Synthetic route of PAH-MMA. (b) Mechanism of charge-reversal of PAH-MMA under proton.

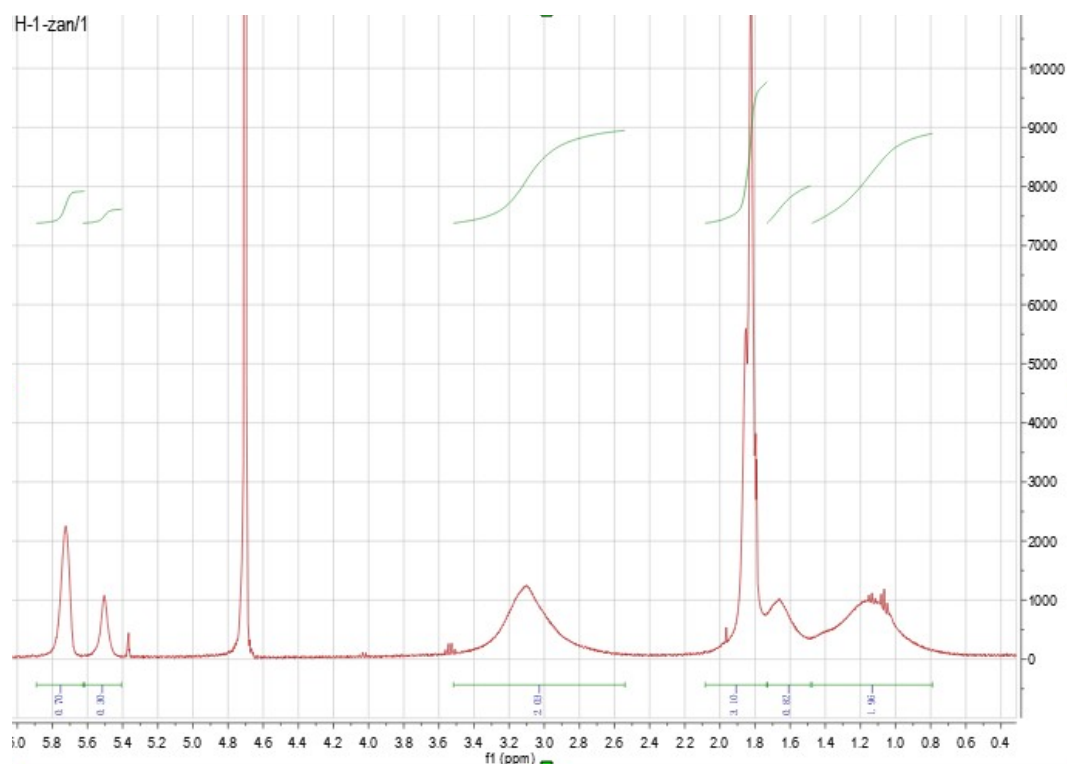

**Figure S1.**  $^1\text{H}$  NMR of PAH-MAA.

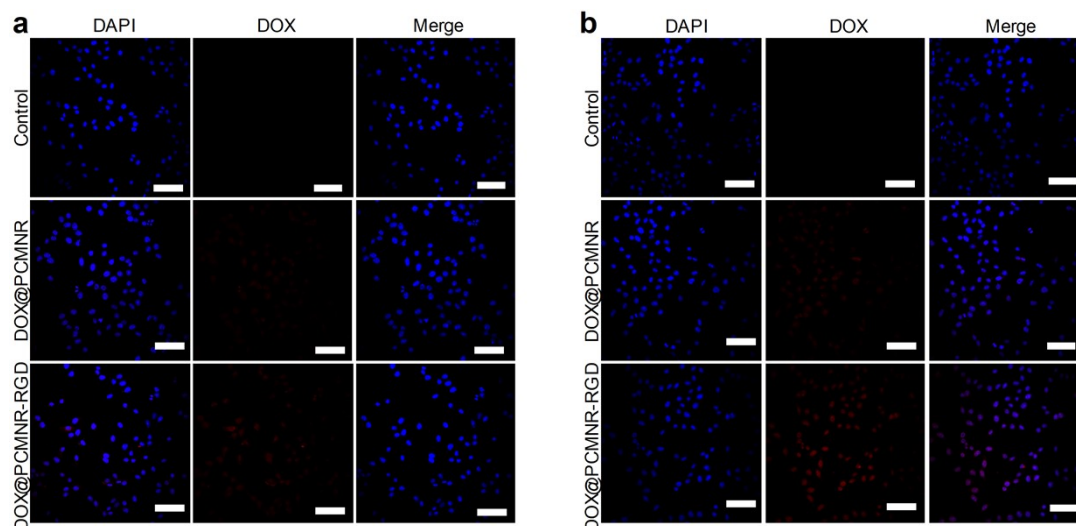

**Figure S2.** Confocal images of HeLa cells after incubation with DOX@PCMNR or DOX@PCMNR-RGD for 1 h (a) and 2 h (b). The scale bars represent 100  $\mu\text{m}$ .

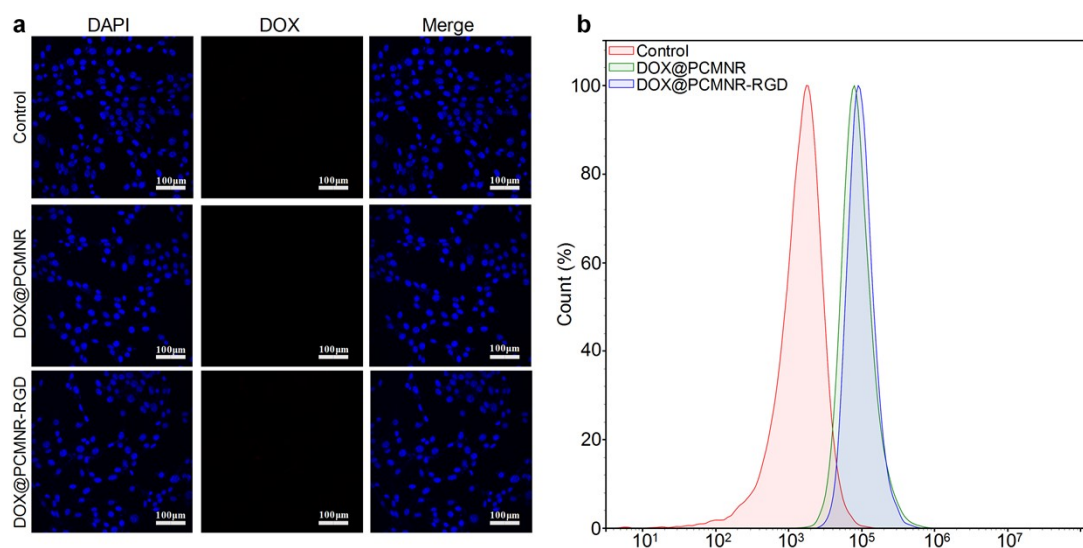

**Figure S3.** (a) Confocal fluorescence images of NIH3T3 cells under different treatments. (b) Flow cytometry analysis of fluorescence intensity of NIH3T3 cells under different treatments.

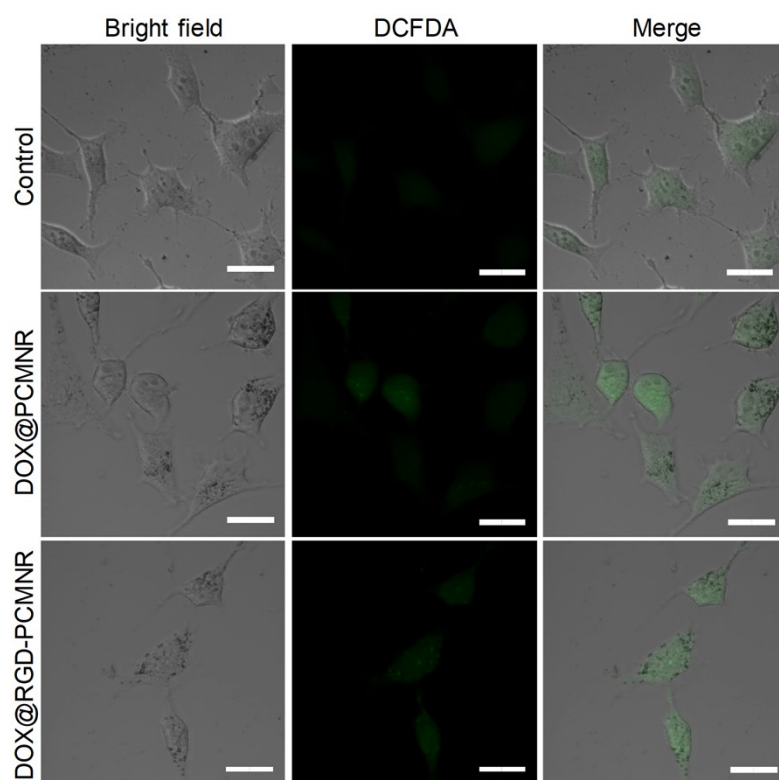

**Figure S4.** Intracellular ROS generation of nanomedicines indicated by DCFDA. The scale bars represent 20  $\mu\text{m}$ .

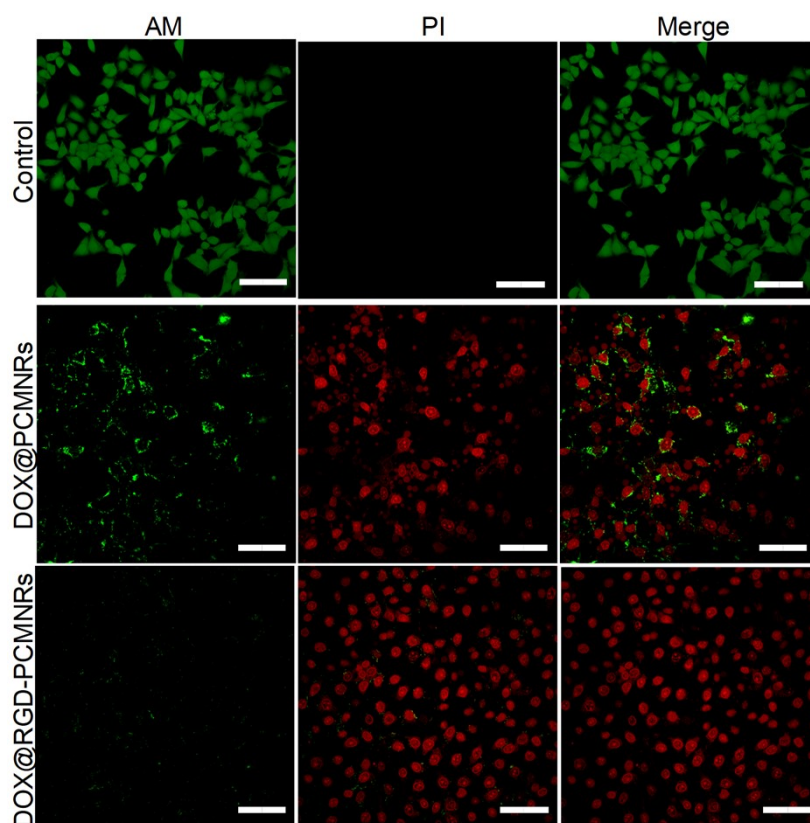

**Figure S5.** Live/dead assays of HeLa cells treated with DOX@PCMNR or DOX@PCMNR-RGD for 40 h. The scale bars represent 100  $\mu$ m.

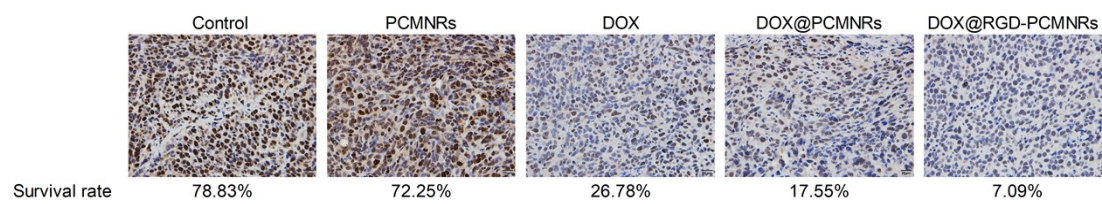

**Figure S6.** PCNA staining of tumor slices from tumor bearing mice under different treatments.
